# Supplementary material for: Apoptosis of tumor infiltrating effector TIM-3+CD8+ T cells in colon cancer
Source: PubMed Central journal article supplement (PMC4616166; doi:10.1038/srep15659), 2015-10-23
Supplement: srep15659-s1.pdf [file srep15659-s1.pdf]

## **Apoptosis of tumor infiltrating effector TIM-3+CD8+ T cells in colon cancer**

Chiao-Wen Kang, Avijit Dutta, Li-Yuan Chang, Jayashri Mahalingam, Yung-Chang Lin, Jy-Ming Chiang, Chen-Yu Hsu, Ching-Tai Huang, Wan-Ting Su, Yu-Yi Chu, Chun-Yen Lin.

*Supplemental Figures*

**Supplementary Figure 1**

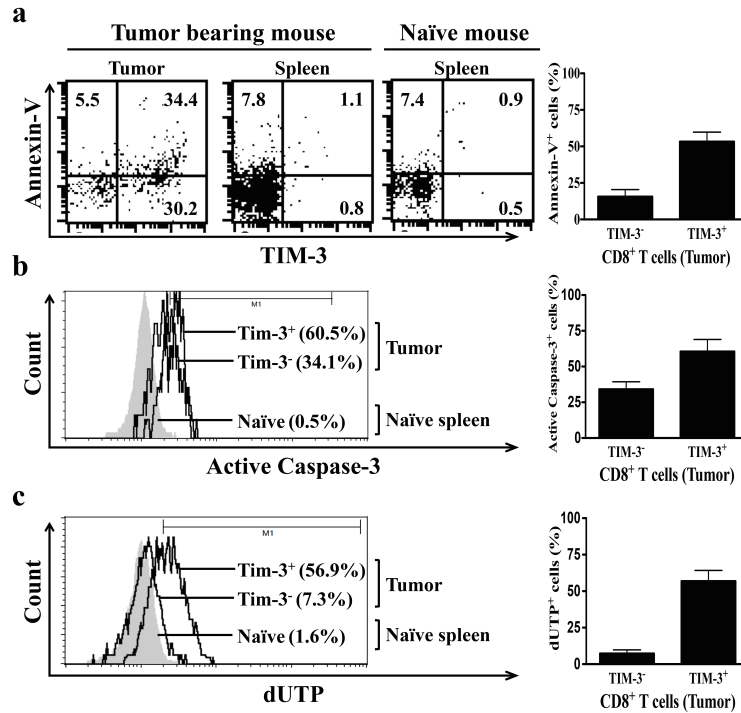

**Increased apoptosis of TIM-3<sup>+</sup> compared to TIM-3<sup>-</sup> tumor-infiltrating CD8<sup>+</sup> T cells in CT26 mouse colon tumor model.** CT-26 tumor cells were inoculated in BALB/c mice and were allowed to form solid tumor. Higher percentage of (A) Annexin-V (B) active Caspase-3 and (C) d-UTP positive cells in TIM-3<sup>+</sup> compared to TIM-3<sup>-</sup> population of tumor-infiltrating CD8<sup>+</sup> T cells on day 14 post tumor inoculation. Splenic CD8<sup>+</sup> T cells from naïve mice served as control. Data are mean ± SD.
